# Supplementary material for: K8Ce2I18O53: a novel potassium cerium(iv) iodate with enhanced visible light driven photocatalytic activity resulting from polar zero dimensional [Ce(IO3)8]4− units
Source: Royal Society of Chemistry journal article supplement (doi:10.1039/c7dt00185a), 2017-01-01

## Supporting Information

$K_8Ce_2I_{18}O_{53}$ : A New Potassium Cerium (IV) Iodate with Enhanced Visible-Light Driven Photocatalytic Activity Resulting from Zero Dimensional  $[Ce(IO_3)_8]^{4-}$  Unit

Ruofei Wu,<sup>a,b</sup> Xingxing Jiang,<sup>a</sup> Mingjun Xia,<sup>\*,a</sup> Lijuan Liu,<sup>a</sup> Xiaoyang Wang,<sup>a</sup> Zheshuai Lin,<sup>a</sup> and Chuangtian Chen<sup>a</sup>

<sup>a</sup>Beijing Center for Crystal Research and Development, Key Laboratory of Functional Crystals and Laser Technology, Technical Institute of Physics and Chemistry, Chinese Academy of Sciences, Beijing 100190, China.

<sup>b</sup>University of Chinese Academy of Sciences, Beijing 100049, China.

## **Contents:**

### **1. Powder X-ray diffraction**

### **2. Single crystal structure determination**

### **3. Element analysis**

### **4. IR spectrum**

### **5. Thermal analysis**

### **6. UV-VIS-NIR diffuse reflectance spectrum**

### **7. Tables**

Table S1. Crystal data and structure refinement for  $\text{K}_8\text{Ce}_2\text{I}_{18}\text{O}_{53}$ .

Table S2. Selected bond lengths (Å) and angles (degree) for  $\text{K}_8\text{Ce}_2\text{I}_{18}\text{O}_{53}$ .

Table S3. Positional coordinates and equivalent isotropic displacement parameters for  $\text{K}_8\text{Ce}_2\text{I}_{18}\text{O}_{53}$

### **8. Figures**

Figure S1. Experimental (red) and simulated (black) X-ray powder diffraction patterns of  $\text{K}_8\text{Ce}_2\text{I}_{18}\text{O}_{53}$ .

Figure S2. XPS measurement on  $\text{K}_8\text{Ce}_2\text{I}_{18}\text{O}_{53}$ .

Figure S3. Elemental analysis of  $\text{K}_8\text{Ce}_2\text{I}_{18}\text{O}_{53}$ .

Figure S4. IR spectra of  $\text{K}_8\text{Ce}_2\text{I}_{18}\text{O}_{53}$ .

Figure S5. Thermal gravimetric (TG) and differential scanning calorimetry (DSC) analysis of  $\text{K}_8\text{Ce}_2\text{I}_{18}\text{O}_{53}$ .

Figure S6. Experimental (red) and simulated (black) X-ray powder diffraction patterns of residues after TG analysis.

Figure S7. UV-vis-NIR diffuse reflectance spectra of  $\text{K}_8\text{Ce}_2\text{I}_{18}\text{O}_{53}$ .

Figure S8. Different mechanism of RhB degradation in  $\text{K}_8\text{Ce}_2\text{I}_{18}\text{O}_{53}$  and P25.

.

**1. Powder X-ray diffraction:** Powder X-ray powder diffraction analysis in the range  $2\theta = 10\text{--}70^\circ$  with a  $0.02^\circ$  scan step width and a  $0.05\text{ s / step}$  counting time was performed with the use of an automated Bruker D8 X-ray diffractometer equipped with Cu  $K\alpha$  radiation ( $\lambda = 1.5418 \text{ \AA}$ ). The results were compared with simulated ones derived from single crystal structure.

**2. XPS measurement:** The X-ray photoelectron spectroscopy (XPS) experiments were carried out by a Thermo Scientific Escalab 250Xi system equipped with a monochromatic Al- $K\alpha$  X-ray source. The spectra were registered after purging the samples at ambient temperature under vacuum (residual pressure  $< 10^{-7} \text{ Pa}$ ). An electron flood gun compensated the sample charging during the measurement. The electron take off angle was  $45^\circ$  with respect to the sample surface, and the analyzer was operated in constant pass energy mode ( $46.95 \text{ eV}$ ). The  $\text{C}_{1s}$  signal at  $284.8 \text{ eV}$  was used as an internal standard for calibration of the XPS-signals.

**2. Single crystal structure determination:** A  $\text{K}_8\text{Ce}_2\text{I}_{18}\text{O}_{53}$  crystal with the dimensions of  $0.12 \times 0.10 \times 0.09 \text{ mm}^3$  was chosen for single crystal X-ray diffraction measurement. The crystal data were collected by using graphite-monochromated Mo  $K\alpha$  radiation ( $\lambda = 0.71073 \text{ \AA}$ ) on a Bruker APEX II single crystal X-ray diffractometer at  $153 \text{ K}$ . The structure was solved with direct method by program SHELXS-97 and refined by the full matrix least squares on  $F^2$  by SHELXL-97, respectively. All atoms were refined with anisotropic displacement parameters. The crystal structure was verified by the ADDSYM algorithm using program PLATON and no additional symmetry was given.

**3. Element Analysis:** Elemental analysis of the crystals was performed on an EDX-equipped Hitachi S-4800 SEM instrument, and the results showed that the crystals consisted of I : Ce : K in a molar ratio of  $9 : 1.06 : 3.83$  which is consistent with the theoretical ratio ( $9 : 1 : 4$ ).

**4. IR spectrum:** Infrared (IR) spectrum was measured at room temperature with a Bio-Rad FTS-60 FTIR spectrometer in the range  $400\text{--}4000 \text{ cm}^{-1}$  with a resolution of  $1 \text{ cm}^{-1}$ . The sample was mixed thoroughly with dried KBr at a mass ratio of  $1:100$ .

**5. Thermal analysis:** The thermal gravimetric analysis (TGA) was performed with a

NETZSCH STA 409C/CD thermal analyzer. In detail, an 18.8 mg powder sample was thoroughly ground, carefully placed in a platinum crucible, and heated from room temperature to 1050 °C at a rate of 10 °C/min in a flowing nitrogen atmosphere.  $K_8Ce_2I_{18}O_{53}$  shows high stability in thermal analysis, it is stable up to 400 °C and displays three main steps of weight loss, which are in 412-505 °C, 505-600 °C, and 660-918 °C, respectively. The final residue are confirmed as  $CeO_2$  which account for 7.24% of total mass, whereas the calculated number is 9.2%.

**6. UV-vis-NIR diffuse reflectance spectrum:** The diffuse reflectance spectrum of  $K_8Ce_2I_{18}O_{53}$  was measured on a Varian Cary 5000 UV-vis-NIR spectrophotometer with a  $BaSO_4$  plate used as a reference material (100% reflectance). The optical absorption spectra were converted from diffuse reflectance spectra using the Kubelka-Munk function,  $F(R) = \alpha/S = (1-R)^2/2R$ , where R is the diffuse reflectance and  $\alpha$  and S are the Kubelka-Munk absorption and scattering coefficients, respectively. The results shows  $K_8Ce_2I_{18}O_{53}$  has a high transmission in the range from 500 nm – 2.5  $\mu m$ .

Table S1. Crystal data and structure refinement for  $K_8Ce_2I_{18}O_{53}$ .

---

|                                             |                                  |
|---------------------------------------------|----------------------------------|
| Empirical formula                           | $K_8Ce_2I_{18}O_{53}$            |
| Formula weight                              | 3725.24                          |
| Temperature                                 | 153.15                           |
| Wavelength (Å)                              | 0.71073                          |
| Crystal system                              | Monoclinic                       |
| Space group                                 | $C2/c$                           |
| $a$ (Å)                                     | 18.2793(7)                       |
| $b$ (Å)                                     | 11.4855(7)                       |
| $c$ (Å)                                     | 13.2212(6)                       |
| $\beta$ (°)                                 | 100.471(2)                       |
| Volume(Å <sup>3</sup> )                     | 2709.5(2)                        |
| $Z$                                         | 2                                |
| Density (g cm <sup>-3</sup> )               | 4.533                            |
| $\mu$ (mm <sup>-1</sup> )                   | 12.564                           |
| $F(000)$                                    | 3292                             |
| $GOF$ on $F^2$                              | 1.063                            |
| R indices [ $I > 2\sigma(I)$ ] <sup>a</sup> | $R_1 = 0.0437$ , $wR_2 = 0.1151$ |
| R indices [all data] <sup>a</sup>           | $R_1 = 0.0485$ , $wR_2 = 0.1177$ |

---

<sup>a</sup> $R_1 = \sum ||F_o| - |F_c|| / \sum |F_o|$ ;  $wR_2 = \{(\sum [w(F_o^2 - F_c^2)^2]) / \sum wF_o^4\}^{1/2}$

---

Table S2. Selected bond lengths (Å) and angles (degree) for K<sub>8</sub>Ce<sub>2</sub>I<sub>18</sub>O<sub>53</sub>.

---

|                     |          |                      |          |
|---------------------|----------|----------------------|----------|
| Ce(1)-O(8)          | 2.270(8) | Ce(1)-O(3)           | 2.325(8) |
| Ce(1)-O(5)          | 2.361(8) | Ce(1)-O(11)          | 2.385(8) |
| I(1)-O(4)           | 1.822(3) | I(1)-O(2)            | 1.868(1) |
| I(1)-O(4)#2         | 1.822(3) | I(1)-O(2) #2         | 1.868(1) |
| I(2)-O(7)           | 1.789(1) | I(2)-O(12)           | 1.802(9) |
| I(2)-O(5)           | 1.846(8) | I(3)-O(9)            | 1.783(1) |
| I(3)-O(13)          | 1.812(9) | I(3)-O(8)            | 1.855(8) |
| I(4)-O(6)           | 1.788(9) | I(4)-O(10)           | 1.807(9) |
| I(4)-O(3)           | 1.834(8) | I(5)-O(1)            | 1.905(1) |
| I(5)-O(14)          | 1.781(1) | I(5)-O(11)           | 1.834(8) |
| K(1)-O(1)           | 2.491(1) | K(1)-O(3)            | 2.655(9) |
| K(1)-O(6)           | 2.699(9) | K(1)-O(10)           | 2.828(1) |
| K(1)-O(7)           | 2.839(1) | K(1)-O(12)           | 2.896(1) |
| K(1)-O(4)           | 3.09(3)  | K(1)-O(5)            | 3.140(9) |
| K(2)-O(9)           | 2.654(1) | K(2)-O(6)            | 2.848(1) |
| K(2)-O(2)           | 2.857(1) | K(2)-O(12)           | 2.882(1) |
| K(2)-O(9)           | 2.908(1) | K(2)-O(7)            | 2.957(1) |
| K(2)-O(14)          | 3.386(2) | K(2)-O(10)           | 3.045(1) |
| O(9)#1-Ce(1)-O(9)   | 97.7(4)  | O(9)-Ce(1)-O(12)#5   | 66.8(2)  |
| O(9)#1-Ce(1)-O(5)#2 | 132.3(2) | O(5)#2-Ce(1)-O(12)#5 | 137.0(3) |
| O(9)-Ce(1)-O(5)#2   | 77.5(3)  | O(5)#3-Ce(1)-O(12)#5 | 65.9(2)  |

---

Table S3. Coordinates, equivalent isotropic displacement parameters and bond valence sums (BVS) for  $K_8Ce_2I_{18}O_{53}$ .

| Atom | x/a        | y/b         | z/c        | Ueq [ $\text{\AA}^2$ ] | BVS  |
|------|------------|-------------|------------|------------------------|------|
| Ce1  | 0.0000     | 0.13442(8)  | 0.7500     | 0.0099(2)              | 4.15 |
| I1   | 0.0000     | 0.62121(12) | 0.7500     | 0.0379(4)              | 4.69 |
| I2   | 0.92919(4) | 0.88098(6)  | 0.55381(6) | 0.0179(2)              | 5.03 |
| I3   | 0.12950(4) | 0.36539(6)  | 0.65479(6) | 0.0161(2)              | 4.97 |
| I4   | 0.70529(4) | 0.60777(6)  | 0.84771(5) | 0.0127(2)              | 5.05 |
| I5   | 0.91652(5) | 0.64287(8)  | 0.04191(7) | 0.0265(3)              | 4.66 |
| K1   | 0.84788(2) | 0.8731(3)   | 0.8381(2)  | 0.0333(7)              | 1.40 |
| K2   | 0.78623(1) | 0.6240(3)   | 0.6081(2)  | 0.0308(7)              | 1.01 |
| O1   | 0.9409(8)  | 0.7349(12)  | 0.9328(11) | 0.065(4)               |      |
| O2   | 0.9247(9)  | 0.5173(14)  | 0.6947(12) | 0.073(4)               |      |
| O3   | 0.6205(4)  | 0.5649(7)   | 0.7590(6)  | 0.0175(17)             |      |
| O4   | 0.9699(1)  | 0.684(3)    | 0.862(2)   | 0.015(7)               |      |
| O5   | 0.9943(4)  | 0.9904(8)   | 0.6214(6)  | 0.0204(19)             |      |
| O6   | 0.7326(5)  | 0.7274(8)   | 0.7764(7)  | 0.025(2)               |      |
| O7   | 0.9024(6)  | 0.8048(8)   | 0.6588(7)  | 0.032(2)               |      |
| O8   | 0.0497(4)  | 0.2649(7)   | 0.6526(6)  | 0.0211(18)             |      |
| O9   | 0.1667(6)  | 0.2931(10)  | 0.5564(7)  | 0.041(3)               |      |
| O10  | 0.7609(5)  | 0.4963(8)   | 0.8012(7)  | 0.028(2)               |      |
| O11  | 0.9091(5)  | 0.7692(8)   | 0.1250(7)  | 0.026(2)               |      |
| O12  | 0.8490(5)  | 0.9704(8)   | 0.5106(7)  | 0.0251(19)             |      |
| O13  | 0.0727(6)  | 0.4755(10)  | 0.5816(11) | 0.062(4)               |      |
| O14  | 0.8188(6)  | 0.6319(11)  | 0.9973(9)  | 0.052(3)               |      |

Figure S1. Experimental (red) and simulated (black) X-ray powder diffraction patterns of  $K_8Ce_2I_{18}O_{53}$ .

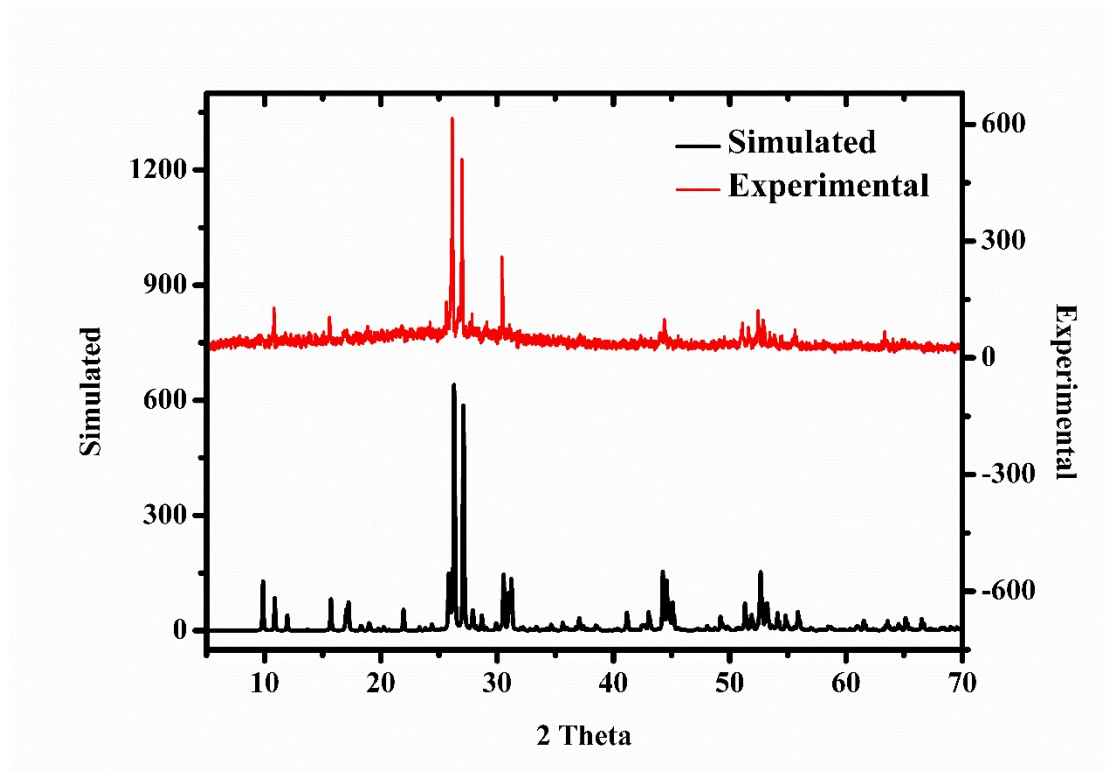



Figure S2. XPS measurement on  $K_8Ce_2I_{18}O_{53}$ .

The binding energy (BE) at  $917.0 \pm 0.2$  eV (Peak 6) associated to the Ce  $3d_{3/2}$  is characteristic of the presence of tetravalent Ce ( $Ce^{4+}$  ions) in Ce-compounds, and also known as fingerprint of Ce (IV) compounds. In comparison with the Ce 3d XPS spectra collected in previous reports, the shape of the  $3d_{5/2}$  and  $3d_{3/2}$  spin-orbit peaks reveal the presence of contributions at about 880.2, 884.3 and 899.8, 903.3 $\pm$ 0.2 eV. All these six peaks are attributed to the pairs of spin-orbit doublets in Ce (IV) states.

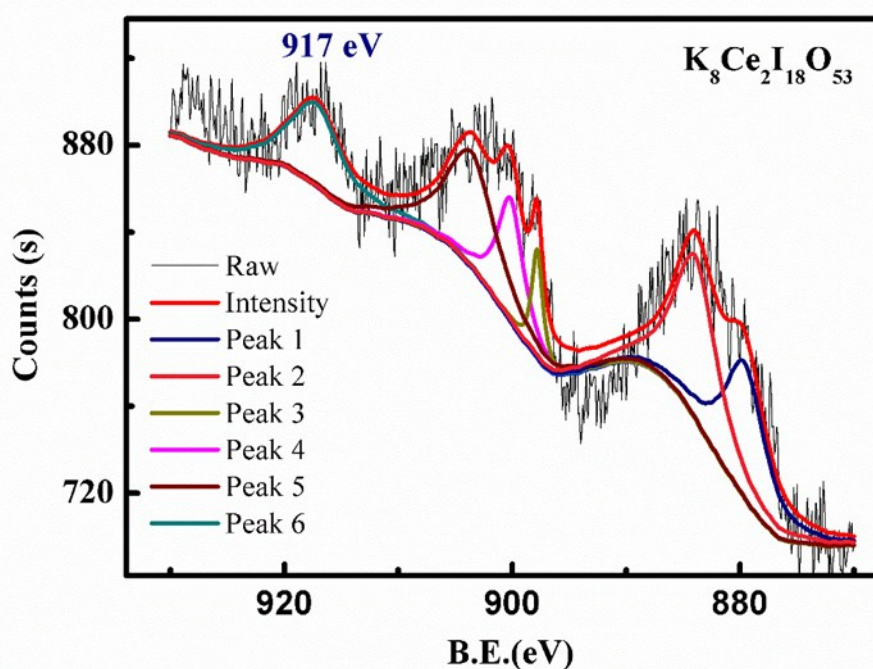

Figure S3. Element analysis of  $K_8Ce_2I_{18}O_{53}$ .

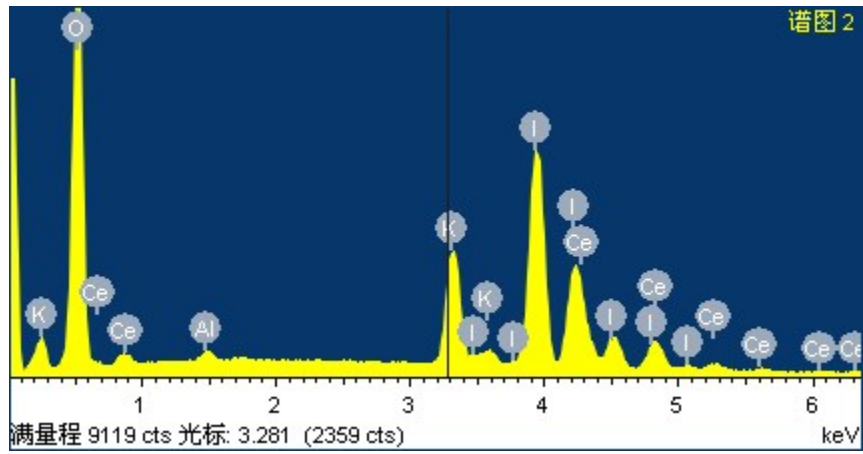

| Element      | Mass (%)      | Molar (%)     |
|--------------|---------------|---------------|
| O K          | 30.52         | 73.36         |
| Al K         | 0.49          | 0.70          |
| K K          | 7.70          | 7.58          |
| I L          | 54.24         | 16.43         |
| Ce L         | 7.04          | 1.93          |
| <b>Total</b> | <b>100.00</b> | <b>100.00</b> |

Figure S4. IR spectra of  $\text{K}_8\text{Ce}_2\text{I}_{18}\text{O}_{53}$ .

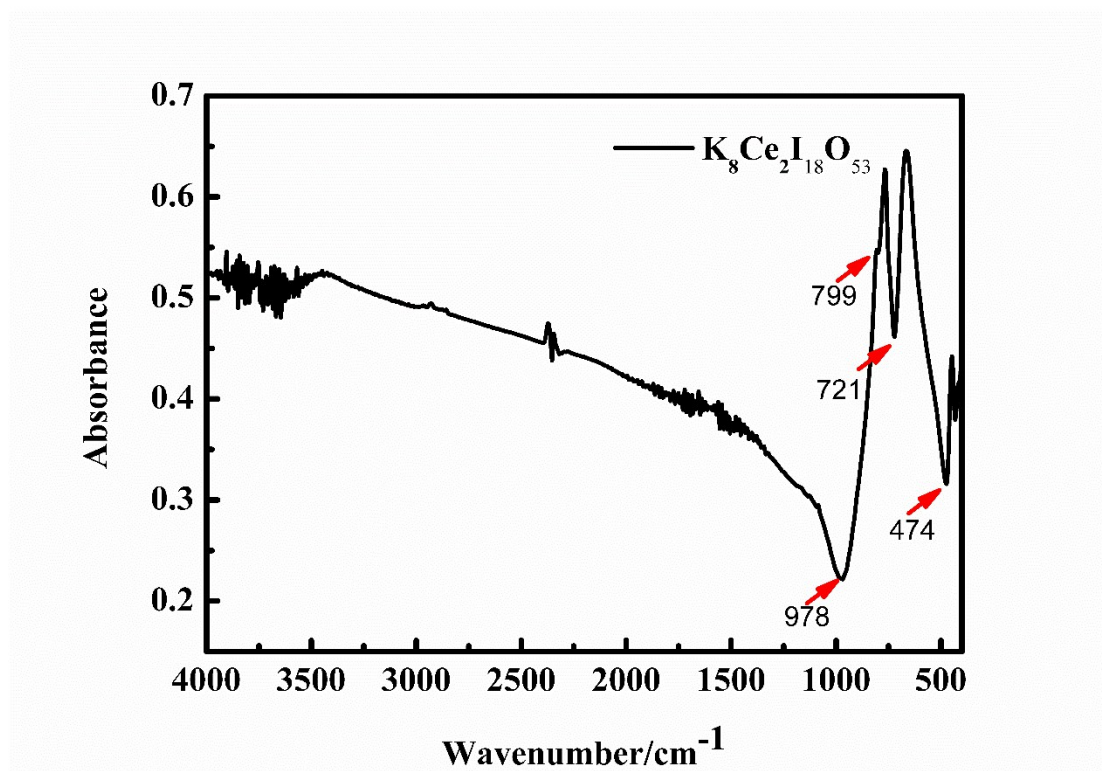

Figure S5. Thermal gravimetric (TG) and differential scanning calorimetry (DSC) analysis of  $\text{K}_8\text{Ce}_2\text{I}_{18}\text{O}_{53}$ .

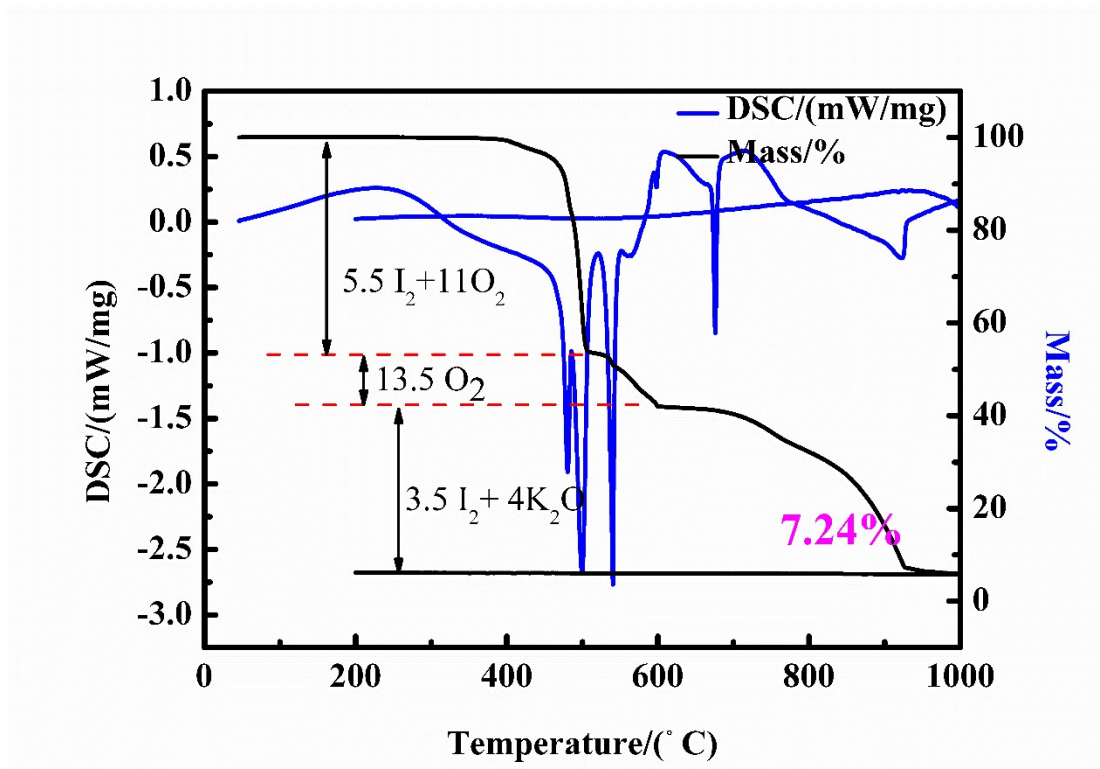

Figure S6. Experimental (red) and simulated (black) X-ray powder diffraction patterns of residues after TG analysis.

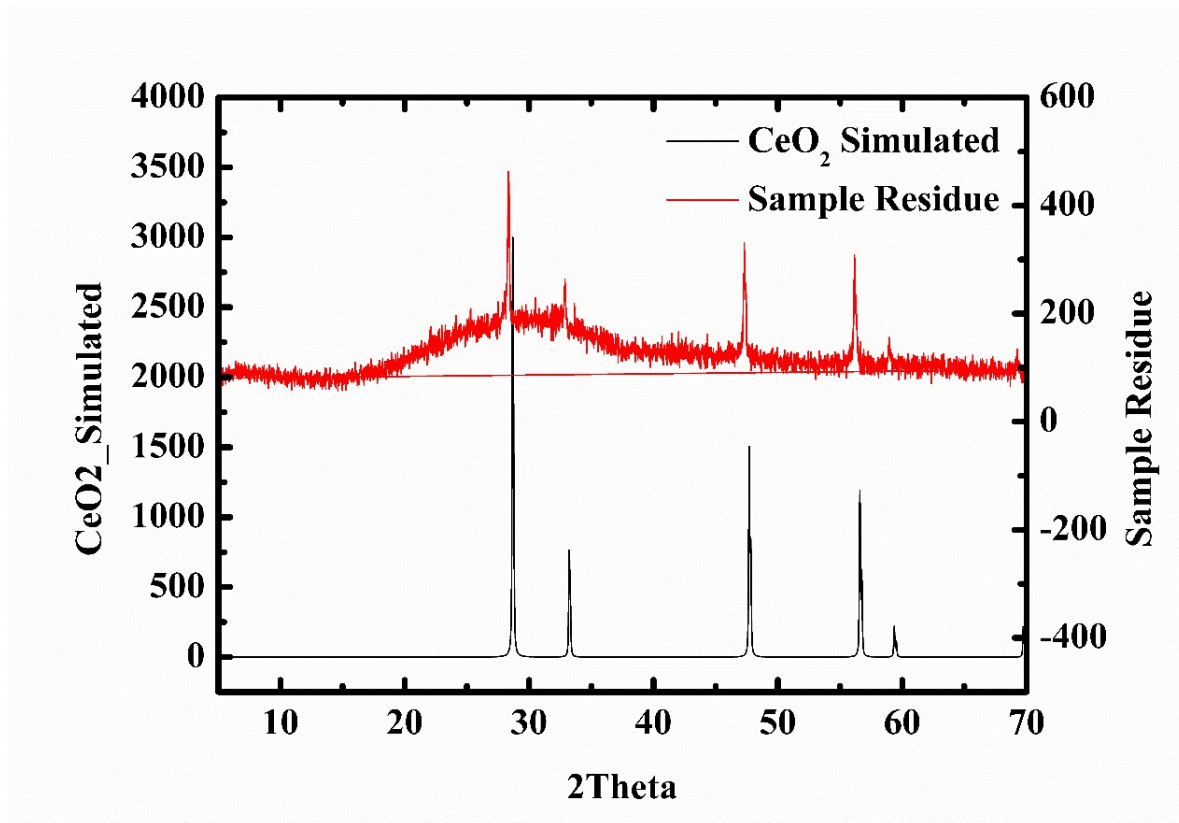



Figure S7. UV-vis-NIR diffuse reflectance spectra of  $K_8Ce_2I_{18}O_{53}$ .

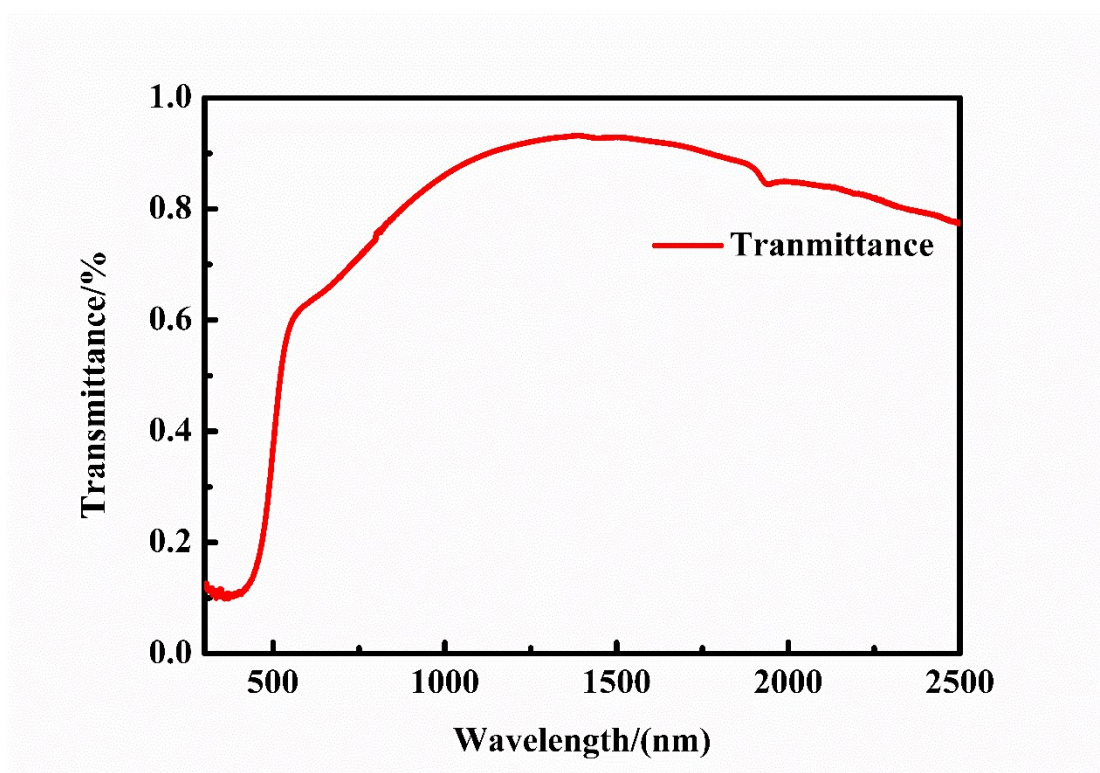

Figure S8. Different mechanism of RhB degradation in  $K_8Ce_2I_{18}O_{53}$  and P25.

The hypsochromic shifts from 554 to 500 nm in RhB photodegradation clearly shows the different mechanistic pathways. As for  $K_2Ce_8I_{18}O_{53}$ , the N-deethylation process followed by the destruction of the skeleton, which account for the blue shift in the left diagram. On the contrary, P25 shows a totally different mechanism, which is a direct breakage of the aromatic ring caused by photosensitization process.

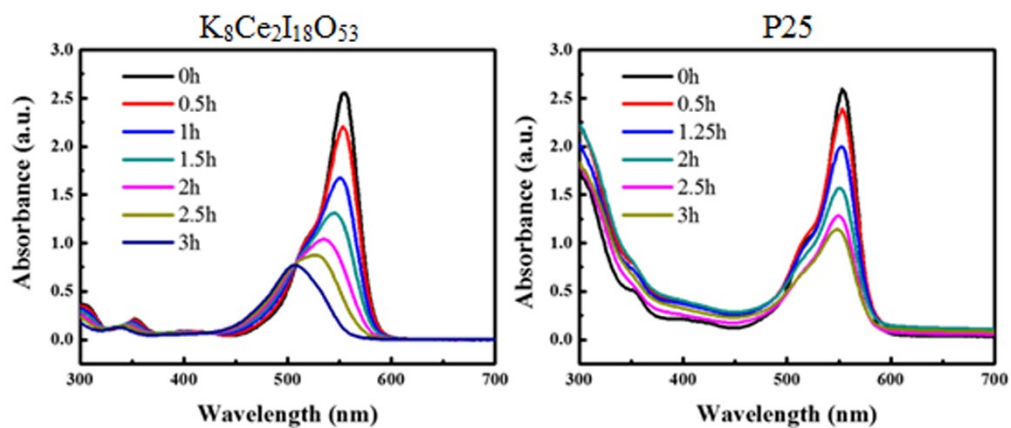

Supplement: c7dt00185a1.pdf [file c7dt00185a1.pdf]
